# Supplementary material for: Characterization of global microRNA expression reveals oncogenic potential of miR-145 in metastatic colorectal cancer
Source: BMC Cancer. 2009 Oct 20;9:374. doi: 10.1186/1471-2407-9-374 (PMC2770572; doi:10.1186/1471-2407-9-374)
Supplement: Additional file 2 — Taqman miRNA Assays. List of 169 ABI early access miRNA Taqman assays. [file 1471-2407-9-374-S2.XLS]

## Sheet: Sheet1
miRNA	Starfire probe sequence
miR-1	5’ TAC ATA CTT CTT TAC ATT CCA 3’
miR-100	5’ CAC AAG TTC GGA TCT ACG GGT T 3’
miR-125b	5’ TCA CAA GTT AGG GTC TCA GGG A 3’
miR-126	5’ GCA TTA TTA CTC ACG GTA CGA 3’
miR-143	5’ TGA GCT ACA GTG CTT CAT CTC A 3’
miR-145	5’ AAG GGA TTC CTG GGA AAA CTG GAC 3’
miR-181a	5’ ACT CAC CGA CAG CGT TGA ATG TT 3’
miR-194	5’ TCC ACA TGG AGT TGC TGT TAC A 3’
miR-19a	5’ TCA GTT TTG CAT AGA TTT GCA CA 3’
miR-20a	5’ CTA CCT GCA CTA TAA GCA CTT TA 3’
miR-25	5’ TCA GAC CGA GAC AAG TGC AAT G 3’
miR-26a	5’ AGC CTA TCC TGG ATT ACT TGA A 3’
miR-30b	5’ GCT GAG TGT AGG ATG TTT ACA 3’
miR-7	5’ AAC AAA ATC ACT AGT CTT CCA 3’
miR-96	5’ GCA AAA ATG TGC TAG TGC CAA A 3’
